# Supplementary material for: Structural white matter and functional connectivity alterations in patients with shoulder apprehension
Source: PubMed Central journal article supplement (PMC5296739; doi:10.1038/srep42327), 2017-02-08
Supplement: srep42327-s1.pdf [file srep42327-s1.pdf]

**Title**

Structural white matter alterations in patients with shoulder apprehension.

**Short title**

Shoulder apprehension and brain structural changes.

**Authors**

Davide Zanchi<sup>1</sup>, Gregory Cunningham<sup>2</sup>, Alexandre Laedermann<sup>2,4,7</sup>, Mehmet Ozturk<sup>2</sup>, Pierre Hoffmeyer<sup>2</sup>, Sven Haller<sup>3,4,5,6</sup>

**Affiliations**

**1** Department of Psychiatry (UPK), University of Basel, Basel, Switzerland

**2** Division of Orthopaedic and Trauma Surgery, Department of Surgery, University Hospitals of Geneva, Switzerland;

**3** Affidea Carouge Radiologic Diagnostic Center, Geneva, Switzerland

**4** Faculty of Medicine of the University of Geneva, Switzerland

**5** Department of Surgical Sciences, Radiology, Uppsala University, Uppsala, Sweden

**6** Department of Neuroradiology, University Hospital Freiburg, Germany

**7** Division of Orthopaedic and Trauma Surgery, La Tour Hospital, Geneva, Switzerland

**Type of Manuscript**

Original manuscript

**Word count**

Original Manuscript: 2352

Abstract: 197

Figures: 3

Supplementary material: 1

**Topics**

Pain, white matter, internal capsule, fMRI, DTI, plasticity

**Corresponding author**

Davide Zanchi, PhD candidate.  
Department of Neuropsychiatry,  
University Psychiatry Clinic  
Wilhelm Klein-Strasse 27,  
4012 Basel, Switzerland.  
0041789084000  
Davide.Zanchi@upkbs.ch

## SUPPLEMENTARY MATERIAL

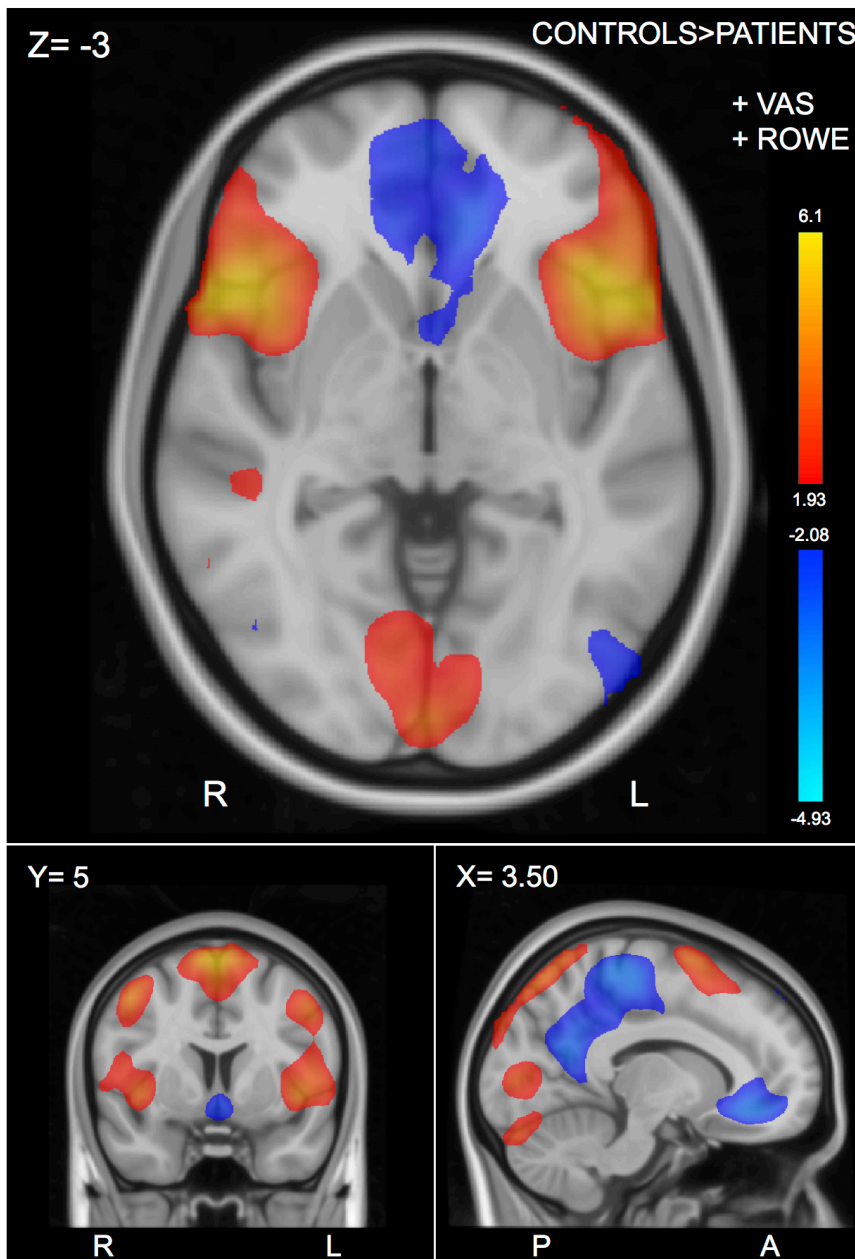

ICA results. After Tensor ICA, paired t-test analyses on S-modes values revealed significant differences ( $p < .01$ ) between controls and patients in a brain network showing hypoactivations in the ventral anterior cingulate cortex, in the posterior cingulate and precuneus, and hyperactivation of anterior insula, motor and somatosensory cortex.
